# Supplementary material for: Validation of a high resolution NGS method for detecting spinal muscular atrophy carriers among phase 3 participants in the 1000 Genomes Project
Source: PubMed Central journal article supplement (PMC4625734; doi:10.1186/s12881-015-0246-2), 2015-10-29
Supplement: 12881_2015_246_MOESM4_ESM.pdf [file 12881_2015_246_MOESM4_ESM.pdf]

| <i>SMN1</i><br>copy<br>number | <i>SMN2</i><br>copy<br>number | $\hat{\theta}$ | Population<br>frequency<br>(%) | $D$ | $D'$ | $r$ | $\frac{D'}{r} = \hat{\pi}'$ | Posterior<br>Likelihood<br>$P(\pi \leq 1/3   D', r)$<br>Conclusion |
|-------------------------------|-------------------------------|----------------|--------------------------------|-----|------|-----|-----------------------------|--------------------------------------------------------------------|
| 1                             | 0                             | 0.25           | < 1                            | 100 | 25   | 100 | 0.25                        | Likely carrier                                                     |
| 1                             | 1                             | 0.50           | < 1                            | 100 | 50   | 200 | 0.25                        | Likely carrier                                                     |
| 2                             | 0                             | 0.50           | 5 – 6                          | 200 | 100  | 200 | 0.50                        | Unlikely carrier                                                   |
| 1                             | 2                             | 0.75           | 1 – 2                          | 100 | 75   | 300 | 0.25                        | Likely carrier                                                     |
| 2                             | 1                             | 0.75           | 30 – 40                        | 200 | 150  | 300 | 0.50                        | Unlikely carrier                                                   |
| 1                             | 3                             | 1.00           | < 1                            | 100 | 100  | 400 | 0.25                        | Likely carrier                                                     |
| 2                             | 2                             | 1.00           | 45 – 50                        | 200 | 200  | 400 | 0.50                        | Unlikely carrier                                                   |
| 3                             | 1                             | 1.00           | 5                              | 300 | 300  | 400 | 0.75                        | Unlikely carrier                                                   |
| 4                             | 0                             | 1.00           | < 1                            | 400 | 400  | 400 | 1.00                        | Unlikely carrier                                                   |
| 1                             | 4                             | 1.00           | < 1                            | 100 | 100  | 500 | 0.20                        | Likely carrier                                                     |
| 2                             | 3                             | 1.00           | 1 – 3                          | 200 | 200  | 500 | 0.40                        | Likely/unlikely carrier                                            |
| 3                             | 2                             | 1.00           | 1 – 2                          | 300 | 300  | 500 | 0.60                        | Unlikely carrier                                                   |
| 4                             | 1                             | 1.00           | < 1                            | 400 | 400  | 500 | 0.80                        | Unlikely carrier                                                   |
