# Supplementary material for: Validation of a high resolution NGS method for detecting spinal muscular atrophy carriers among phase 3 participants in the 1000 Genomes Project
Source: PubMed Central journal article supplement (PMC4625734; doi:10.1186/s12881-015-0246-2), 2015-10-29

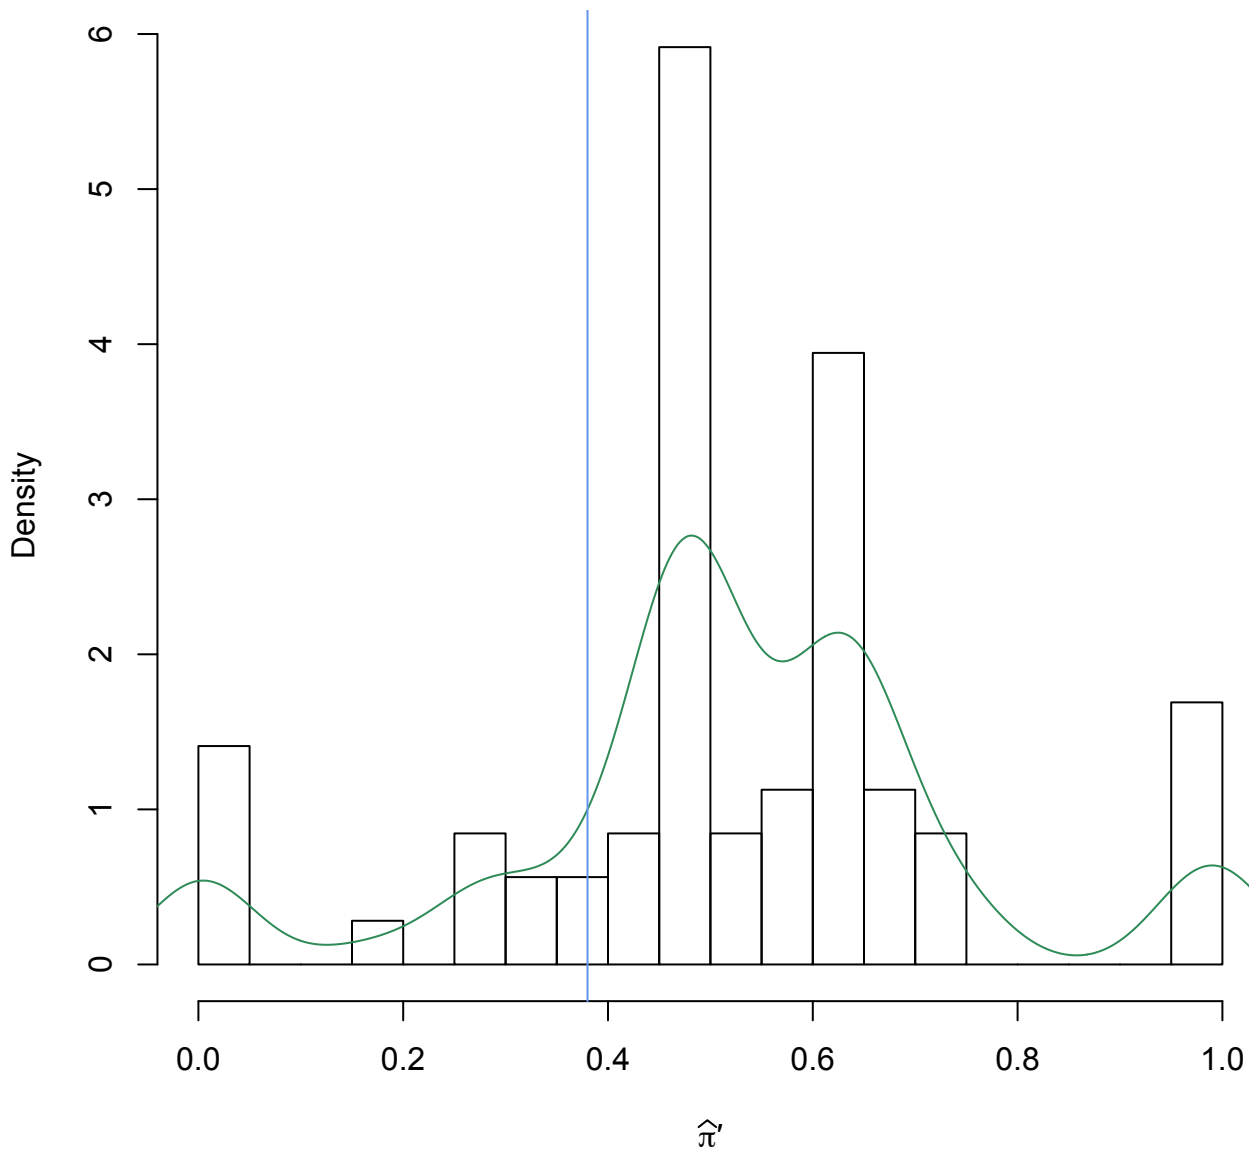

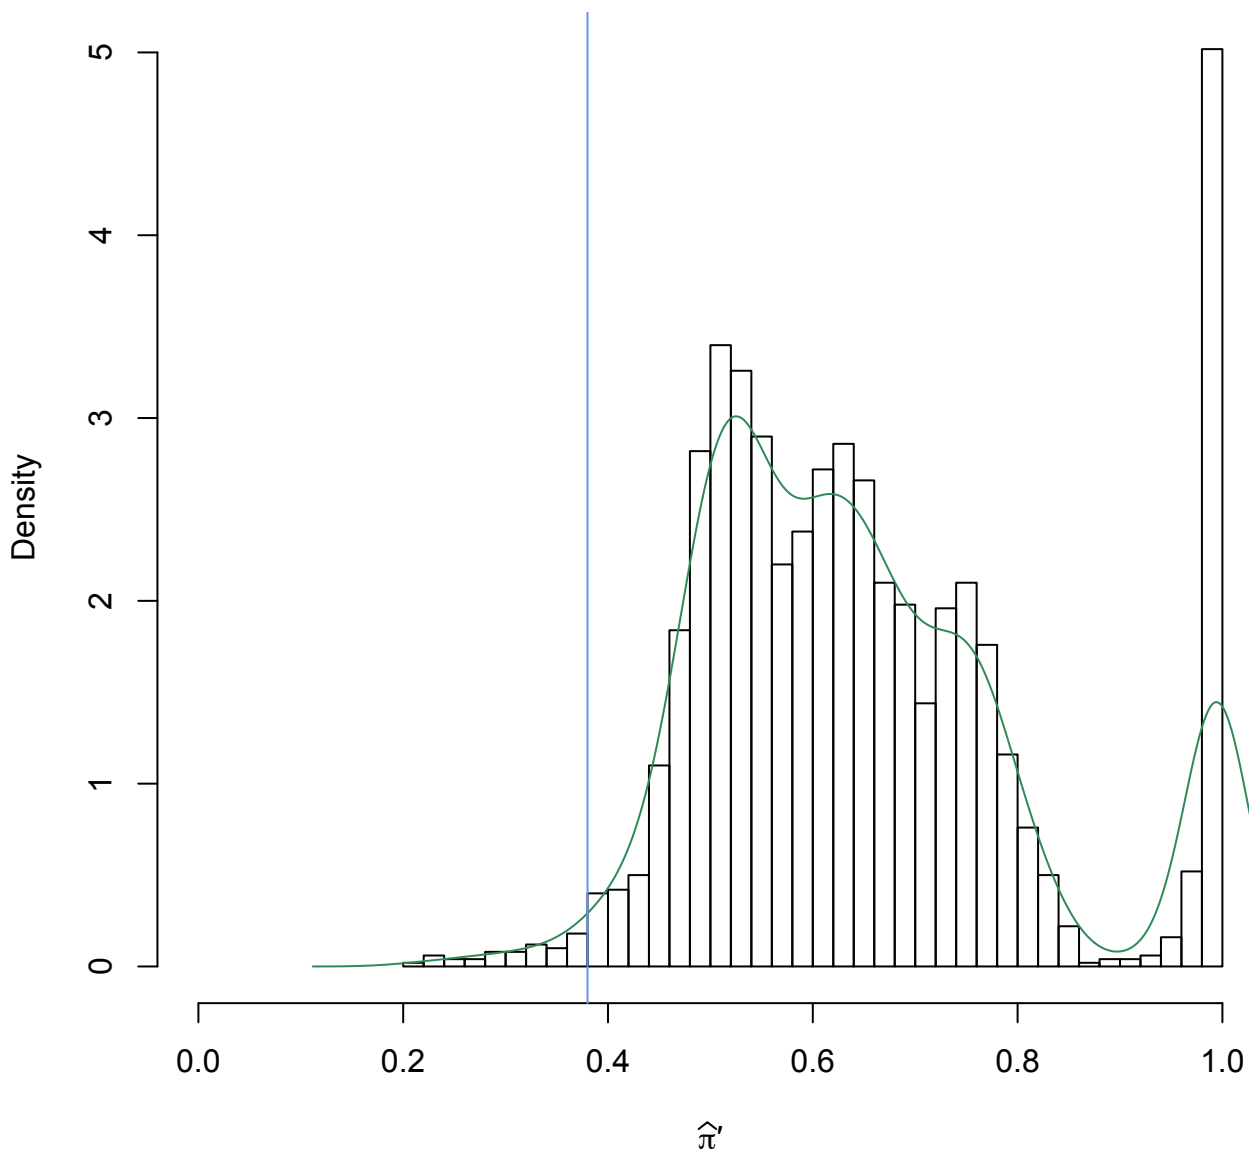

Supplement: 12881_2015_246_MOESM10_ESM.pdf [file 12881_2015_246_MOESM10_ESM.pdf]
