# Supplementary material for: Validation of a high resolution NGS method for detecting spinal muscular atrophy carriers among phase 3 participants in the 1000 Genomes Project
Source: Springer Nature journal article supplement (doi:10.1186/s12881-015-0246-2), 2015-10-28

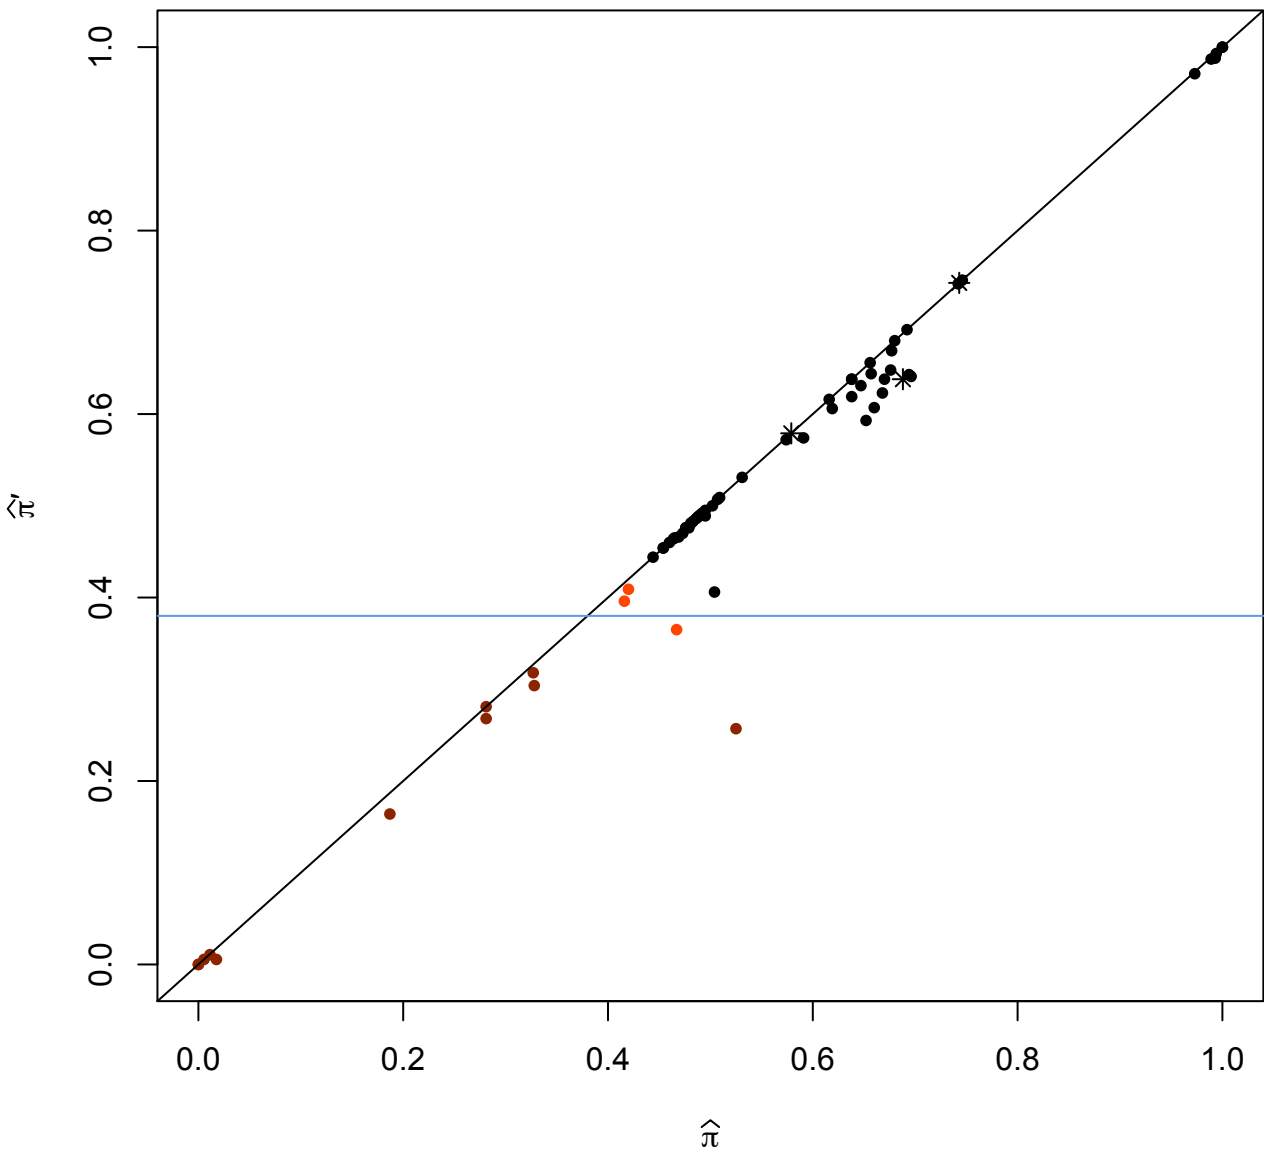

Supplement: MOESM9 [file 9741418]
